# Supplementary material for: Redox reaction mediated direct synthesis of hierarchical flower-like CuO spheres anchored on electrospun poly(vinylidene difluoride) fiber surfaces at low temperatures
Source: Royal Society of Chemistry journal article supplement (doi:10.1039/c5ra20210h), 2015-01-01
Supplement: c5ra20210h1.pdf [file c5ra20210h1.pdf]

## Supporting Information

# Redox Reaction Mediated Direct Synthesis of Hierarchical Flower-Like CuO Spheres Anchored on Electrospun Poly(vinylidene difluoride) Fiber Surfaces at Low Temperatures

Yun-Yang Lee<sup>1</sup>, Hsieh-Yu Li<sup>1</sup>, Shih-Jiuan Chiu<sup>2</sup>, Wen-Li Liang<sup>2</sup>, Pi-Li Yeh<sup>3</sup> and Ying-Ling Liu<sup>1\*</sup>

1. Department of Chemical Engineering, National Tsing Hua University, #101, Sec. 2, Kuang-Fu Road, Hsinchu 30013, Taiwan; 2. School of Pharmacy, College of Pharmacy, Taipei Medical University, Taipei 11031, Taiwan; 3. Department of Microbiology and Immunology, School of Medicine, Taipei Medical University, Taipei 11031, Taiwan

\*Correspondence to Professor Y.-L. Liu, E-mail: [liuyl@mx.nthu.edu.tw](mailto:liuyl@mx.nthu.edu.tw); Fax: +886-3-5715408

**Figure S1** presents the SEM micrograph of the flower-like CuO crystals anchored on the PVDF fiber mat. The micrographs of elements mapping on carbon and fluorine indicate the presence of the PVDF fibers. The Cu and O mapping micrographs are shown in the article supporting to the presence and distribution of CuO crystals.

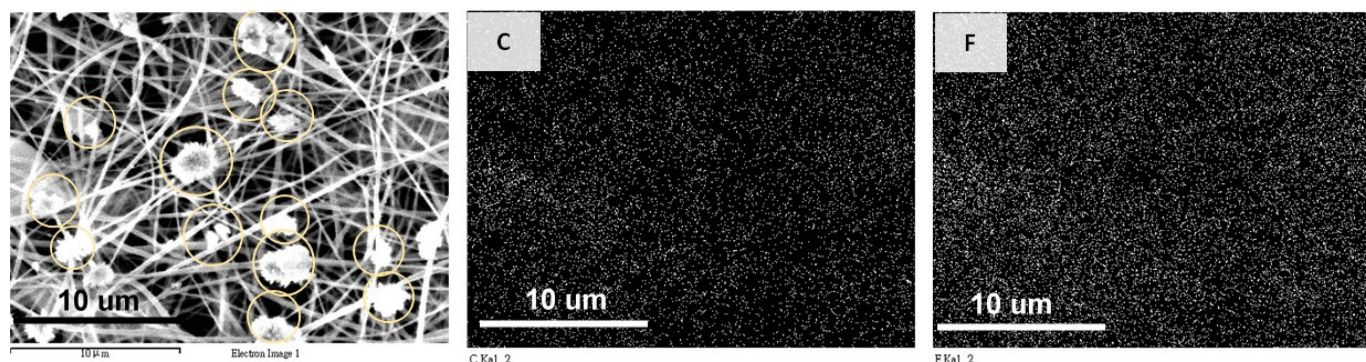

**Figure S1.** SEM micrographs of the flower-like CuO crystals anchored on the PVDF fiber mat and the corresponding elements mapping micrographs for carbon and fluoride.

**Figure S2** collects the SEM micrographs of the samples prepared with a reaction system with increasing the concentration of the reaction agents from 0.005 M to 0.075 M. Increases in the reagent concentrations would increase the concentration of Cu<sup>2+</sup> ions in the reaction solution, so as to increase the rate of the oxidation reaction of Cu (copper foil) to Cu<sup>+</sup>, and consequently to increase the formation rate of CuO crystals. A 4 h reaction time is enough to anchor certain amount CuO crystals on the PVDF fiber mat.

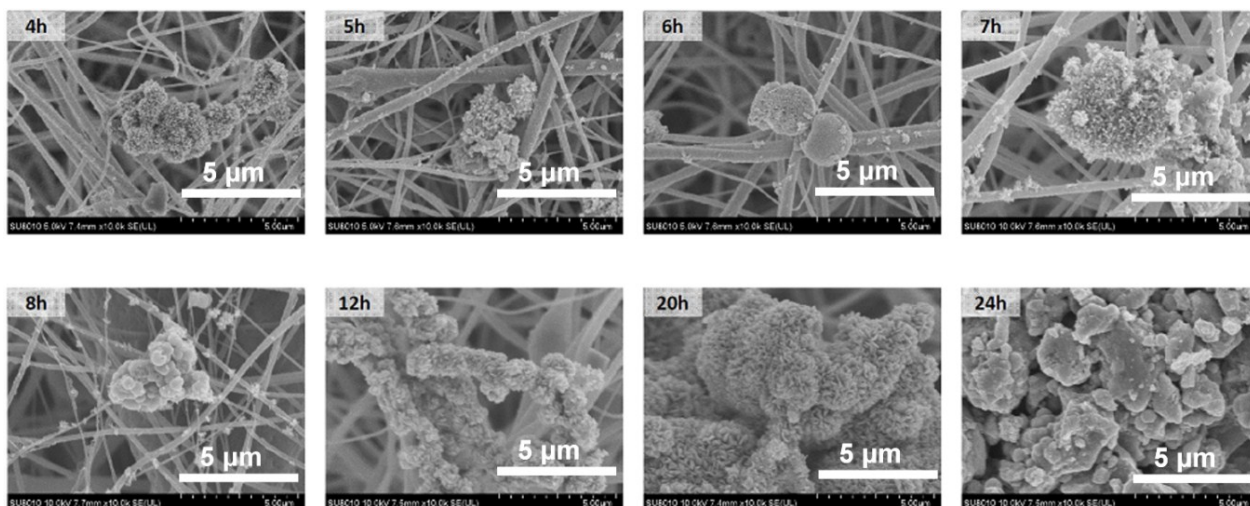

**Figure S2.** SEM micrographs of the samples prepared with a reaction system with an increased concentration of the reaction agents (from 0.005 M to 0.075 M) at different reaction time.

**Figure S3** shows the photographs of RhB solution before and after F-CuO@PVDF catalysed photodegradation. The RhB solution in bright pink color becomes colorless and transparent to indicate the complete degradation of RhB in the solution. **Figure S4** shows the SEM micrographs of the F-CuO@PVDF membranes before and after the photodegradation tests. No obvious changes have been observed with the samples, to indicate that both F-CuO@PVDF samples and F-CuO crystals are robust and stable in the photodegradation operation.

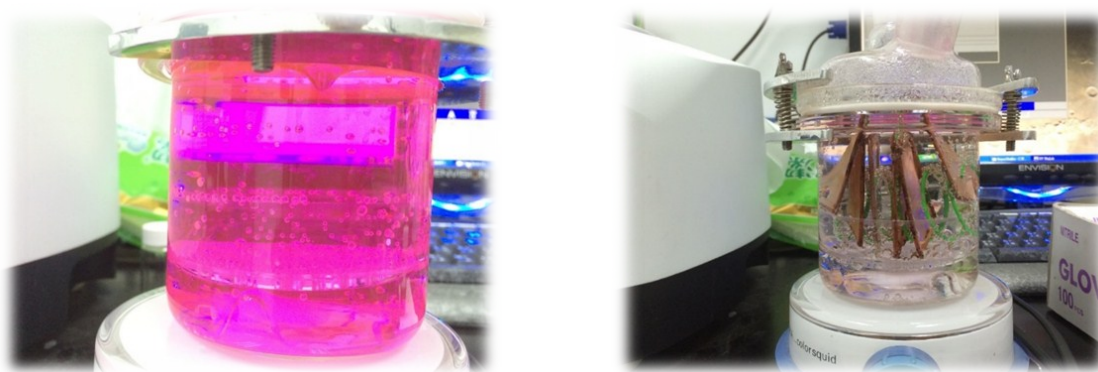

**Figure S3:** Photographs of RhB aqueous solution (right) before and (left) after the photodegradation test.

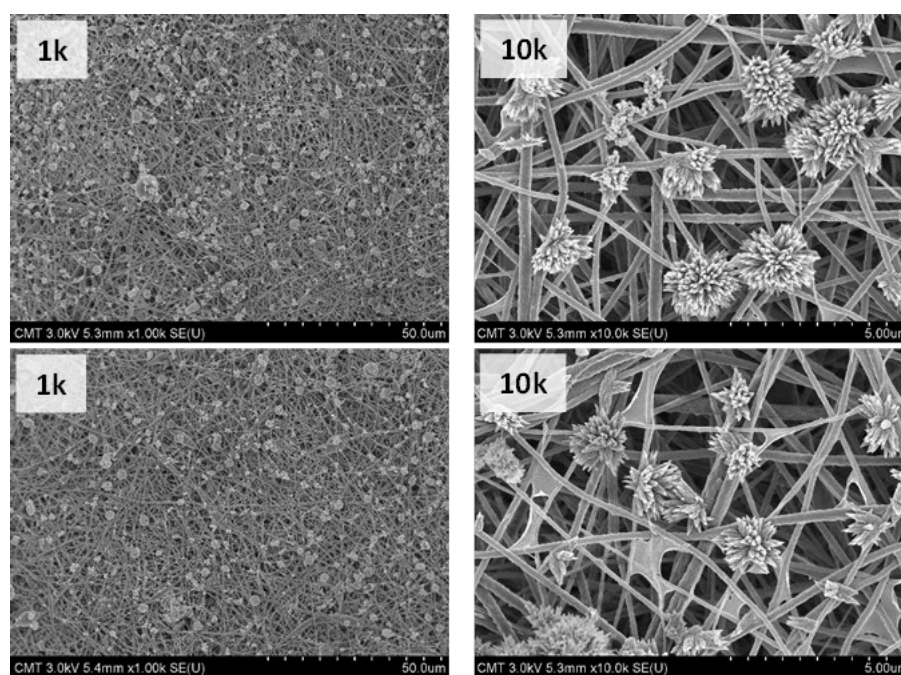

**Figure S4:** SEM micrographs of F-CuO@PVDF membranes (upper) before and (lower) after the photodegradation tests.
